# Supplementary material for: Longitudinal study of the early-life fecal and nasal microbiotas of the domestic pig
Source: PubMed Central journal article supplement (PMC4578254; doi:10.1186/s12866-015-0512-7), 2015-09-21
Supplement: 12866_2015_512_MOESM3_ESM.pdf [file 12866_2015_512_MOESM3_ESM.pdf]

**Supplementary Table 1.** Two-phase starter ration fed to nursery pigs.

| Ingredients                                 | Composition (%) |                 |
|---------------------------------------------|-----------------|-----------------|
|                                             | Phase I Ration  | Phase II Ration |
| Soybean meal, 47%                           | 25.5            | 25.8            |
| Corn chop                                   | 35.3            | 33.5            |
| Whey permeate                               | 10              | 8               |
| Bakery meal                                 | 10              | 10              |
| Wheat chop                                  | 7.8             | 7.5             |
| Wheat shorts                                | 0               | 5               |
| Fish meal                                   | 3               | 2               |
| Blood meal                                  | 2.5             | 2.5             |
| Tallow                                      | 1.4             | 1.5             |
| Monocalcium phosphate                       | 1.1             | 1.05            |
| Limestone                                   | 0.95            | 1               |
| L-lysine, 50%                               | 0.62            | 0.55            |
| DL-methionine, 88%                          | 0.28            | 0.25            |
| Maple Butter                                | 0.2             | 0.1             |
| Fine salt                                   | 0.2             | 0.13            |
| Threonine                                   | 0.19            | 0.16            |
| Selenium                                    | 0.1             | 0.1             |
| Choline chloride, 70%                       | 0.05            | 0.05            |
| Vitamin E (50 KIU/kg)                       | 0.05            | 0.05            |
| PellTech                                    | 0.4             | 0.4             |
| Integral                                    | 0.05            | 0.05            |
| Superzyme-CS                                | 0.05            | 0.05            |
| IntelliBond C (58% Cu)                      | 0.017           | 0.017           |
| Vitamin and mineral supplement <sup>a</sup> | 0.2             | 0.2             |

<sup>a</sup> Formulation per kilogram of starter ration: 100 mg zinc oxide, 270 mg iron, 28 mg manganese, 124 mg copper, 0.60 mg iodine, 0.50 mg selenium, 0.16 mg cobalt, 20 mg fluorine, 10 KIU vitamin A, 1.5 KIU vitamin D3, 70 IU vitamin E, 2.0 mg vitamin K, 20 µg vitamin B12, 6.5 mg riboflavin, 30 mg niacin, 1.34 g choline, 24 mg D-pantothenic acid, 2.5 mg pyridoxine, 2.0 mg thiamine, 3.0 mg folic acid, 200 µg biotin.
